# Supplementary material for: Traditional Chinese Medicine Tang-Luo-Ning Ameliorates Sciatic Nerve Injuries in Streptozotocin-Induced Diabetic Rats
Source: Hindawi journal article supplement (doi:10.1155/2013/989670), 2013-01-01

**Supplemental material**

**Figure 1. High-performance liquid chromatogram of Astragaloside IV in Tang-Luo-Ning particles**

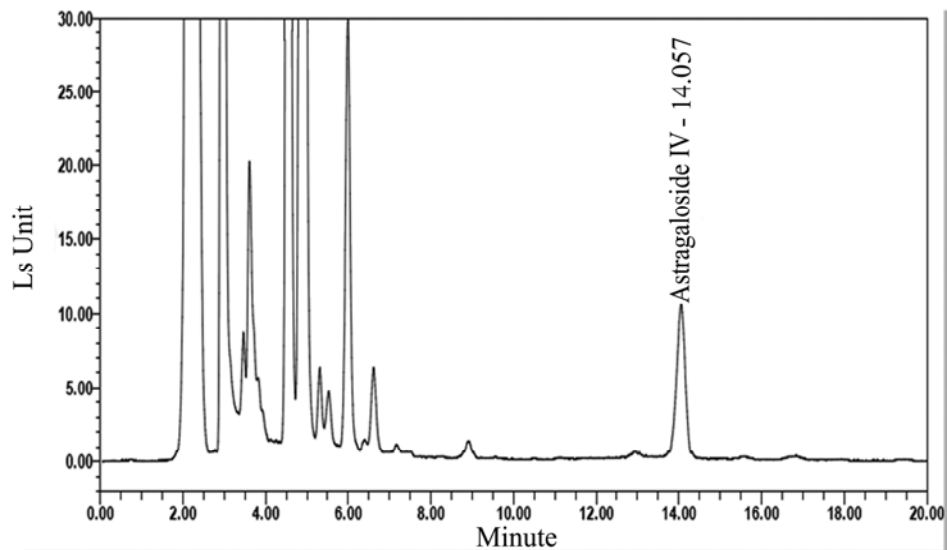

Supplement: f1 [file 989670.f1.pdf]
